# Supplementary material for: On the Evolution of Stress and Microstructure in Radio Frequency-Sputtered Lead-Free (Ba,Ca)(Zr,Ti)O3 Thin Films
Source: MDPI journal article supplement (doi:10.3390/act13030115), 2024-03-20
Supplement: s1 [file s1]

Supplementary Material

# On the Evolution of Stress and Microstructure in Radio Frequency-Sputtered Lead-Free (Ba,Ca)(Zr,Ti)O<sub>3</sub> Thin Films

Runar Plünnecke Dahl-Hansen \*, Marit Synnøve Sæverud Stange, Tor Olav Sunde, Johan Henrik Ræder and Per Martin Rørvik

SINTEF, Forskningsveien 1, 0373 Oslo, Norway; marit.stange@sintef.no (M.S.S.S.); tor.olav.sunde@sintef.no (T.O.S.); per.martin.rorvik@sintef.no (P.M.R.)

\* Correspondence: runard@sintef.no; Tel.: +47-926-54821

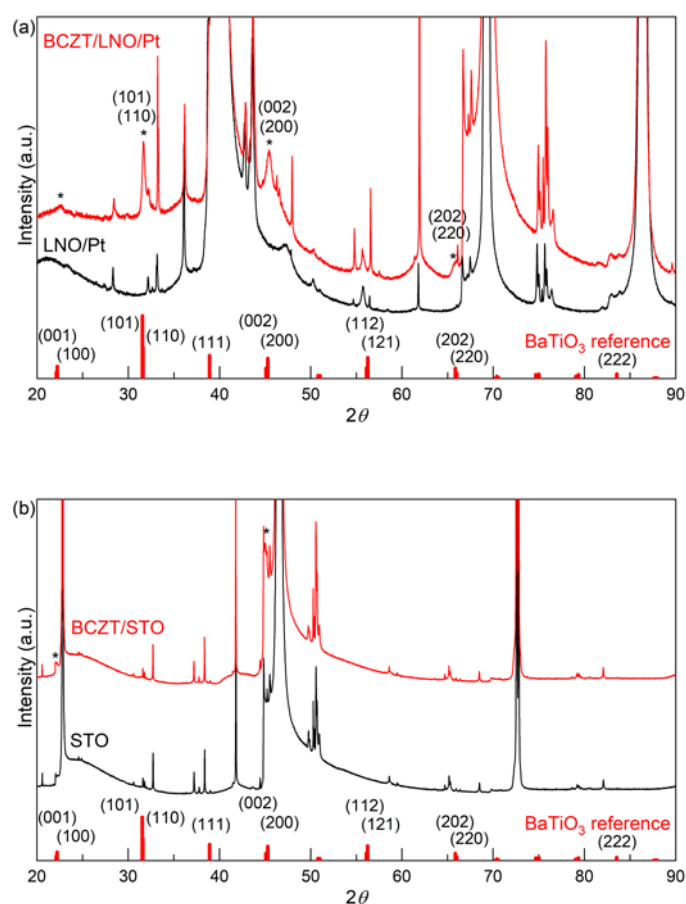

**Figure S1.** X-ray diffractograms of (a) LNO/Pt substrate and BCZT thin film deposited at 700 °C onto LNO/Pt, and (b) STO substrate and BCZT thin film deposited at 700 °C onto STO. Asterisks indicate BCZT reflections. The sticks at the bottom refer to tetragonal BaTiO<sub>3</sub> (COD 2100858). The extra lines in the X-ray diffractograms of the pure substrates originate from the Cu X-ray source and from W contamination of the Cu source as the available diffractometer was not equipped with a monochromator.

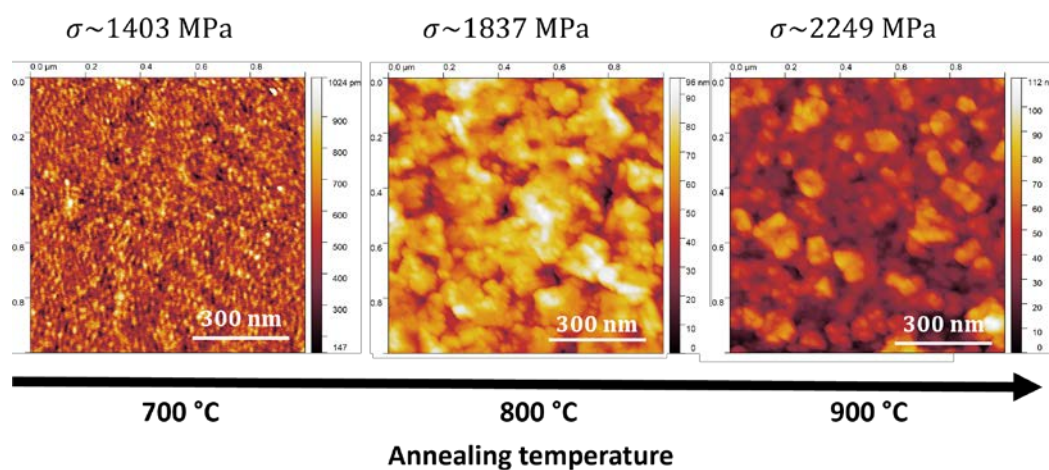

**Figure S2.** AFM images and measured stress of films deposited at room temperature and subsequently post-annealed.

**Table S1.** Radius of curvature before and after deposition, and calculated average in-plane stress, for BCZT films deposited at 700 °C at deposition pressure  $8 \times 10^{-3}$  mbar.

| Material | $r_0$ [m]     | $r$ [m]       | Average stress [MPa] |
|----------|---------------|---------------|----------------------|
| Si       | $914 \pm 300$ | $86 \pm 7$    | $1383 \pm 92$        |
| Pt/Si    | $148 \pm 29$  | $36 \pm 2$    | $1553 \pm 97$        |
| LNO/Pt   | $77 \pm 17$   | $33 \pm 2$    | $1564 \pm 68$        |
| STO      | $3.4 \pm 0.3$ | $4.0 \pm 0.4$ | $-2215 \pm 331$      |
